# Supplementary material
Source: PubMed Central journal article supplement (PMC3076674)
Supplement: NIHMS256407-supplement-1.pdf [file NIHMS256407-supplement-1.pdf]

## Supplementary Information

### Structure of the VP16 Transactivator Target in ARC/Mediator

Alexander G. Milbradt<sup>1</sup>, Madhura Kulkarni<sup>2,3\*</sup>, Tingfang Yi<sup>1\*</sup>, Koh Takeuchi<sup>1,4</sup>, Zhen-Yu J. Sun<sup>1</sup>,  
Rafael E. Luna<sup>1</sup>, Philipp Selenko<sup>1,4</sup>, Anders M. Näär<sup>2,3</sup> and Gerhard Wagner<sup>1</sup>

<sup>1</sup>*Department of Biological Chemistry and Molecular Pharmacology, Harvard Medical School, 240 Longwood Avenue, Boston, MA 02115, <sup>2</sup>Massachusetts General Hospital Cancer Center, Building 149, 13<sup>th</sup> Street, Charlestown, MA 02129, <sup>3</sup>Department of Cell Biology, Harvard Medical School, 240 Longwood Avenue, Boston, MA 02115.*

<sup>4</sup>Present addresses: Biomedical Information Research Center, National Institute of Advanced Industrial Science and Technology, Aomi 2-3-26, Koto, Tokyo, 135-0064 Japan  
Koh-takeuchi@aist.go.jp, T.K.; Leibniz Institute of Molecular Pharmacology (FMP) Department of NMR-assisted Structural Biology Robert-Roessle-Strasse 10 13125 Berlin, Germany  
selenko@fmp-berlin.de, P.S.

\* These authors contributed equally to this work.

Correspondence should be addressed to A.M.N. (naar@helix.mgh.harvard.edu) or G.W. (gerhard\_wagner@hms.harvard.edu).

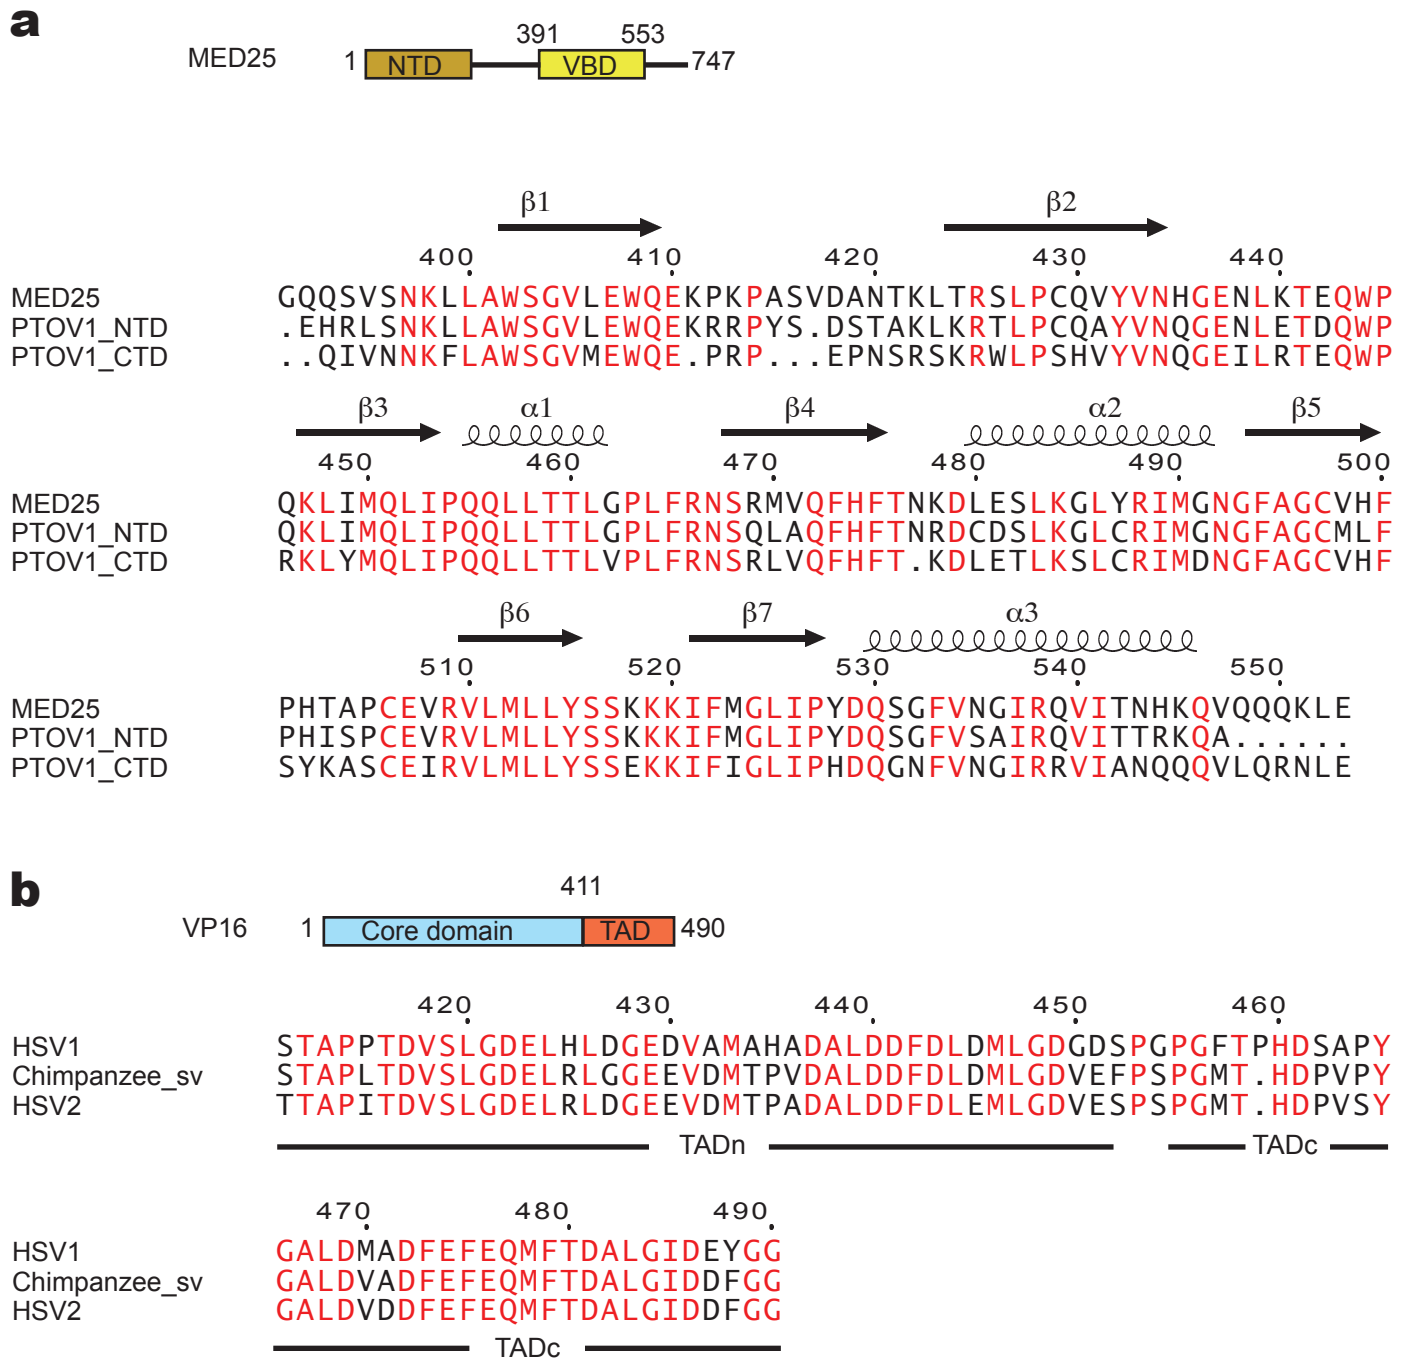

**Supplementary Figure 1.** Sequence alignments of the MED25 VBD and VP16 TAD. **(a)** Sequence of the human MED25 VBD aligned with the homologous C- and N-terminal domain of human PTOV1. Secondary structure elements are shown above the sequences. **(b)** Sequence of the VP16 TAD from *Herpes simplex virus 1* aligned with sequences of TADs from other viruses. Alignments were visualized with ESPript<sup>1</sup>. Conserved residues are highlighted in red.

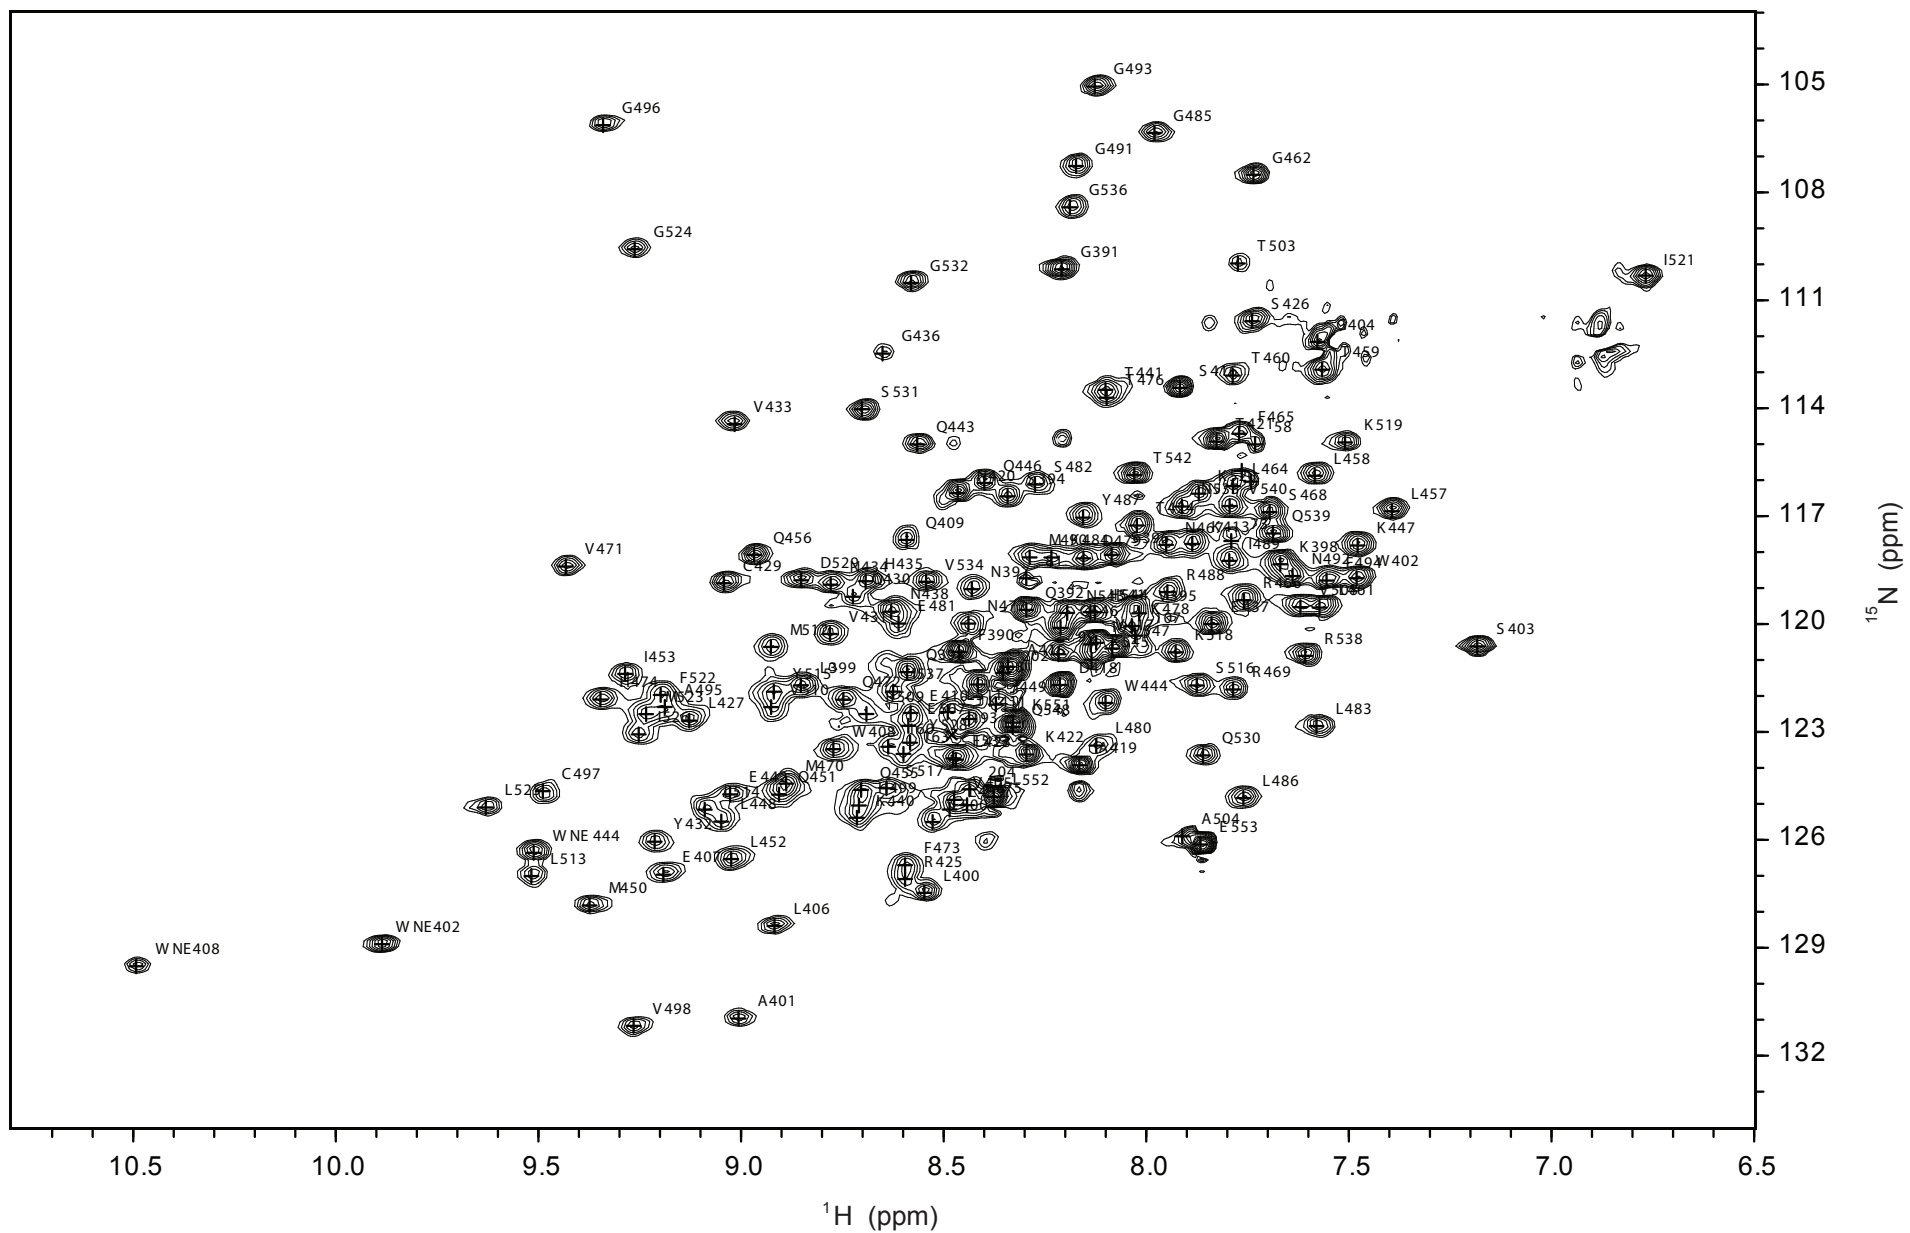

**Supplementary Figure 2.**  $^1\text{H}$ - $^{15}\text{N}$ -HSQC spectrum of the MED25 VBD with the assigned residue numbers.

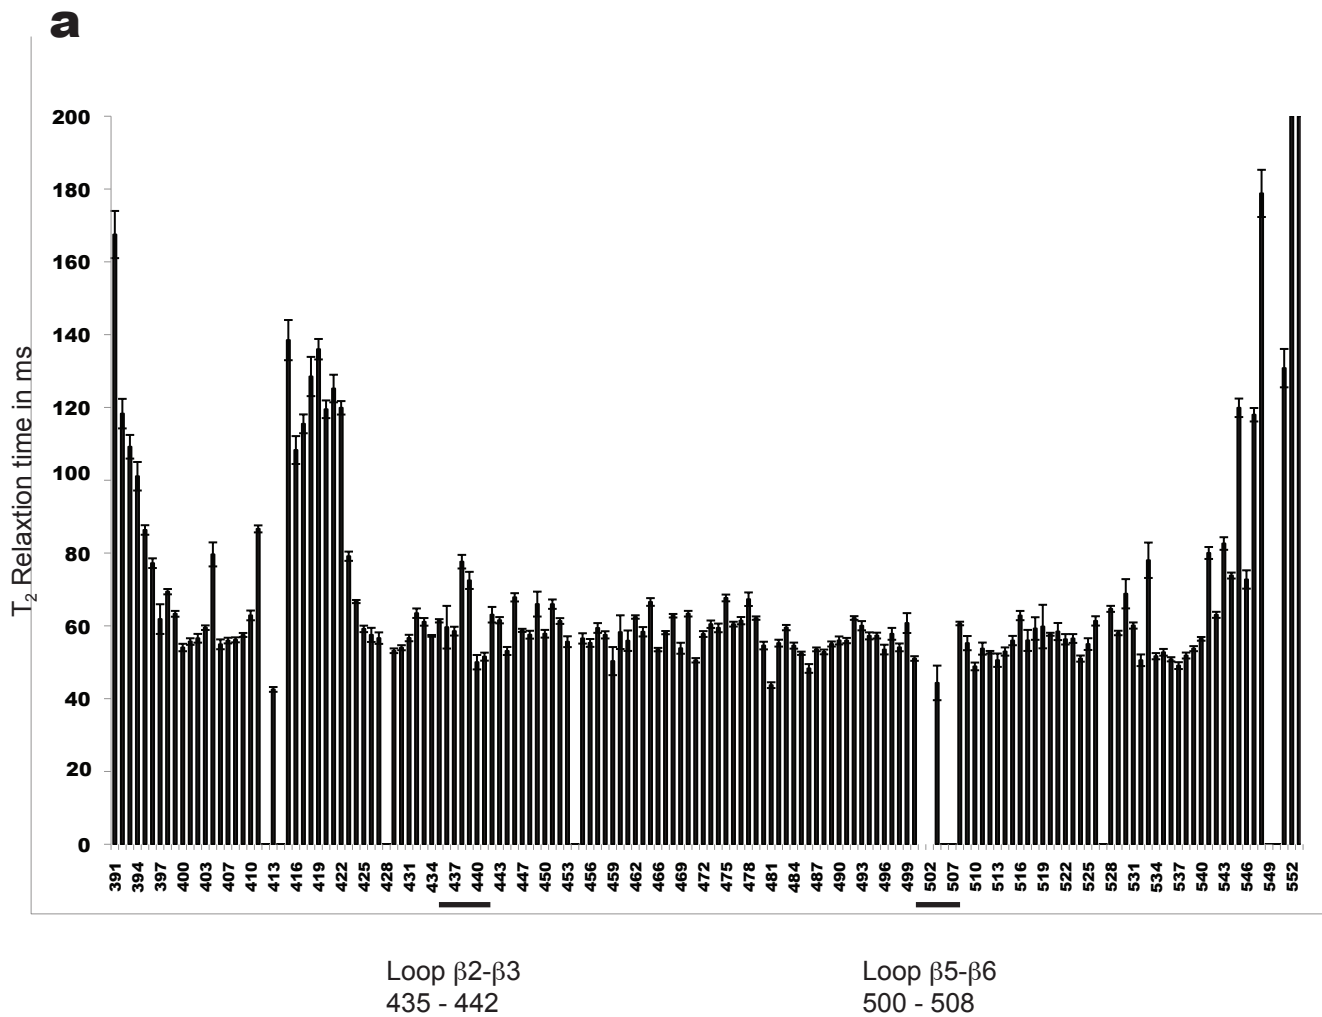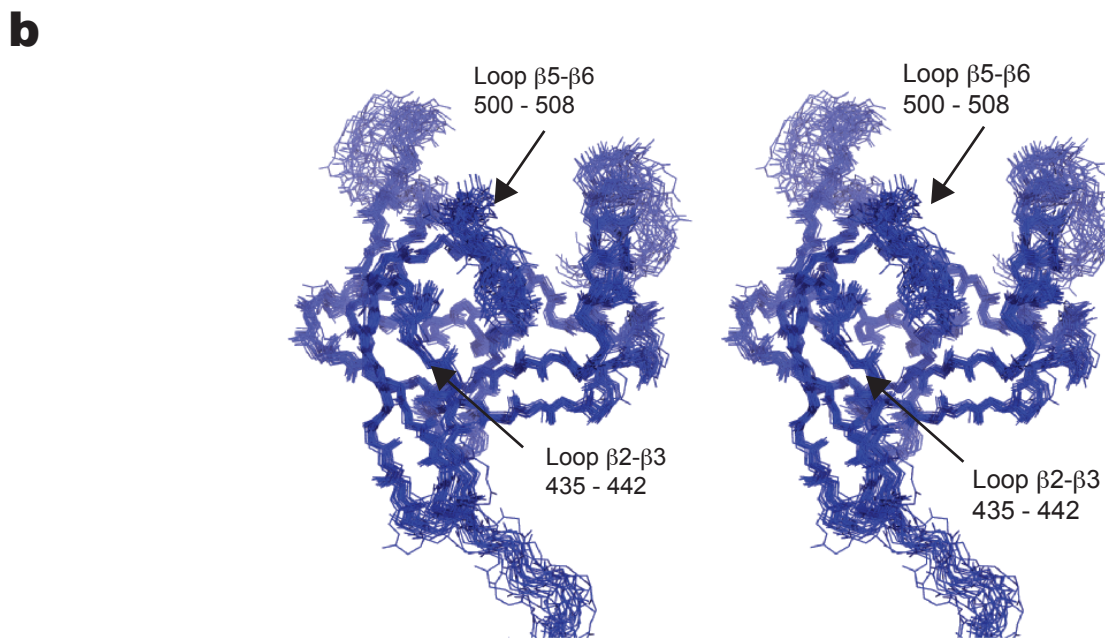

**Supplementary Figure 3.**  $^{15}\text{N}$   $T_2$  relaxation time measurement of the MED25 VBD. **(a)**  $^{15}\text{N}$   $T_2$  relaxation times of the free MED25 VBD are plotted against the residue number. Error bars represent s.d. The N- and C-terminus and the long loop between  $\beta 1$  and  $\beta 2$  display significantly longer  $T_2$  times, indicating local flexibility. Due to line broadening and peak overlap,  $T_2$  times of the residues forming loop  $\beta 5/ \beta 6$  could only be determined for T503. **(b)** The 25 lowest energy structures are shown overlaid on the secondary structure elements. Loop  $\beta 2/ \beta 3$  and loop  $\beta 5/ \beta 6$  close the barrel from the bottom.

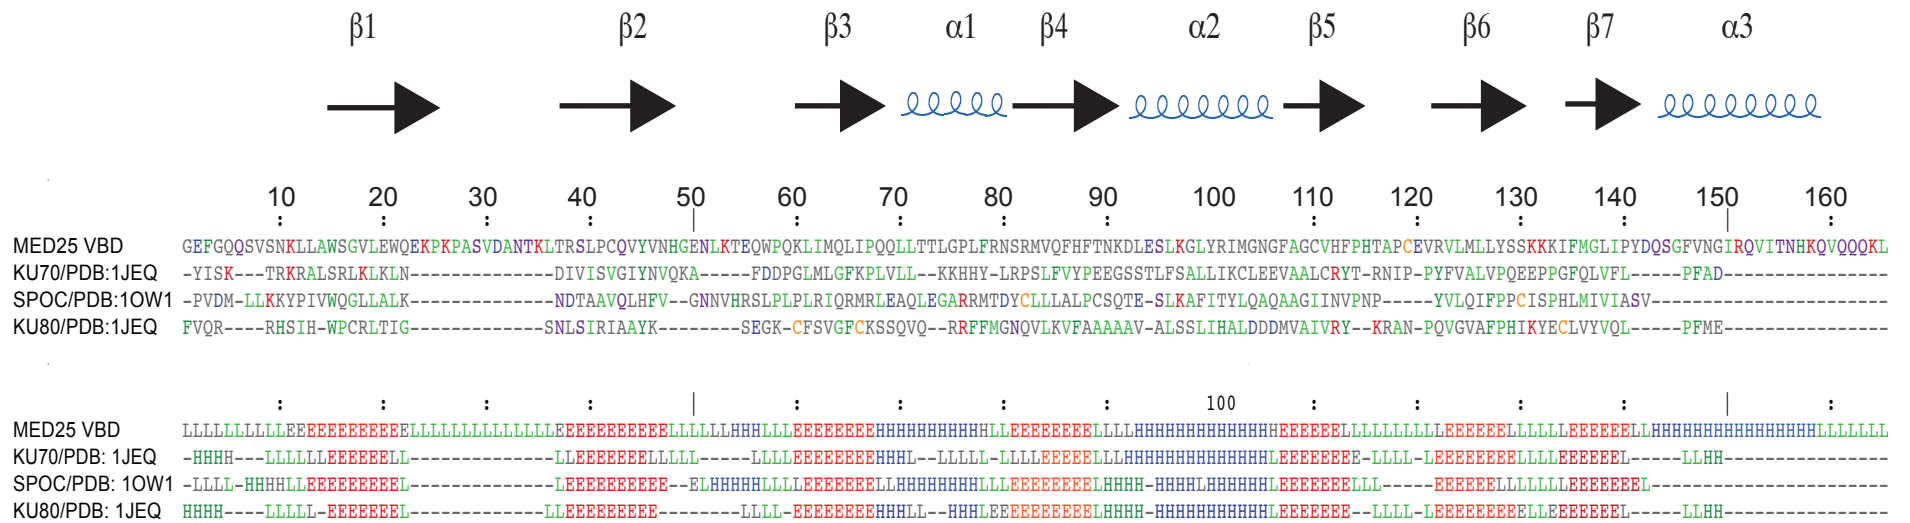

**Supplementary Figure 4.** Structural homology search by DALI<sup>2</sup>. Alignment of amino acid sequences (upper panel) and structural elements (lower panel) with the three structural homologous proteins of MED25 VBD: KU70/PDB: 1JEQ<sup>3</sup>, SPOC/PDB: 1OW1<sup>4</sup>, KU80/PDB:1JEQ<sup>3</sup>. Extended regions are highlighted in red and helical portions are shown in blue (lower panel).

**a**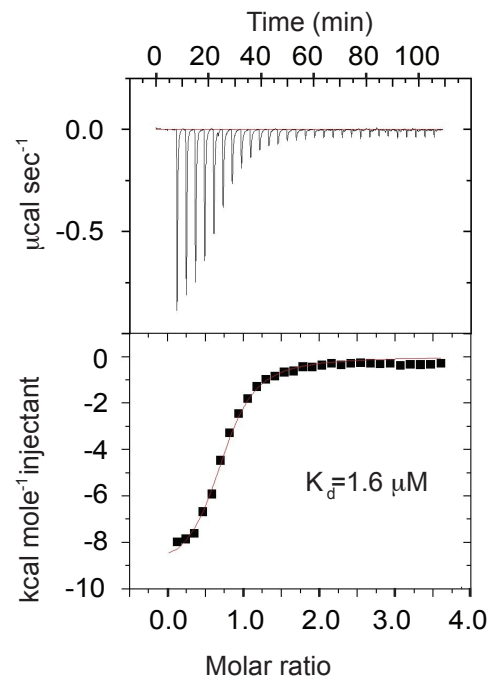**b**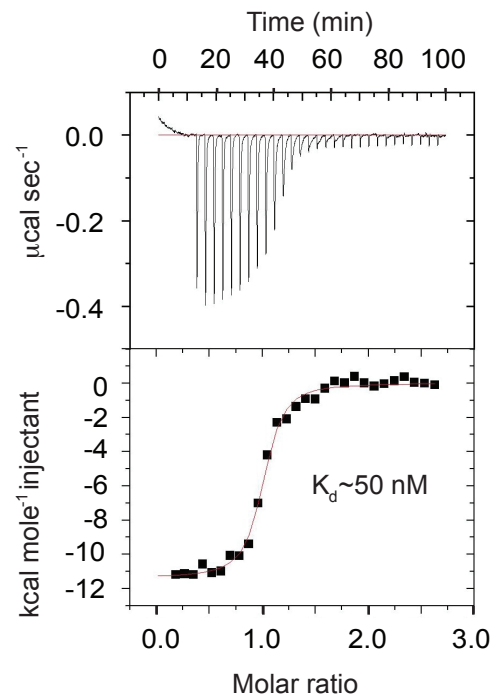

**Supplementary Figure 5.** Isothermal calorimetry titration. **(a)** Isothermal calorimetry titration of MED25 VBD with VP16 TADn revealed a  $K_d$  of 1.6  $\mu\text{M}$ . **(b)** Isothermal calorimetry titration of MED25 VBD with VP16 full-length TAD revealed a  $K_d$  of approximately 50 nM. The C-terminal portion of the VP16 TAD contributes to the binding to MED25 VBD and likely accounts for the difference in  $K_d$  between TADn and TAD.

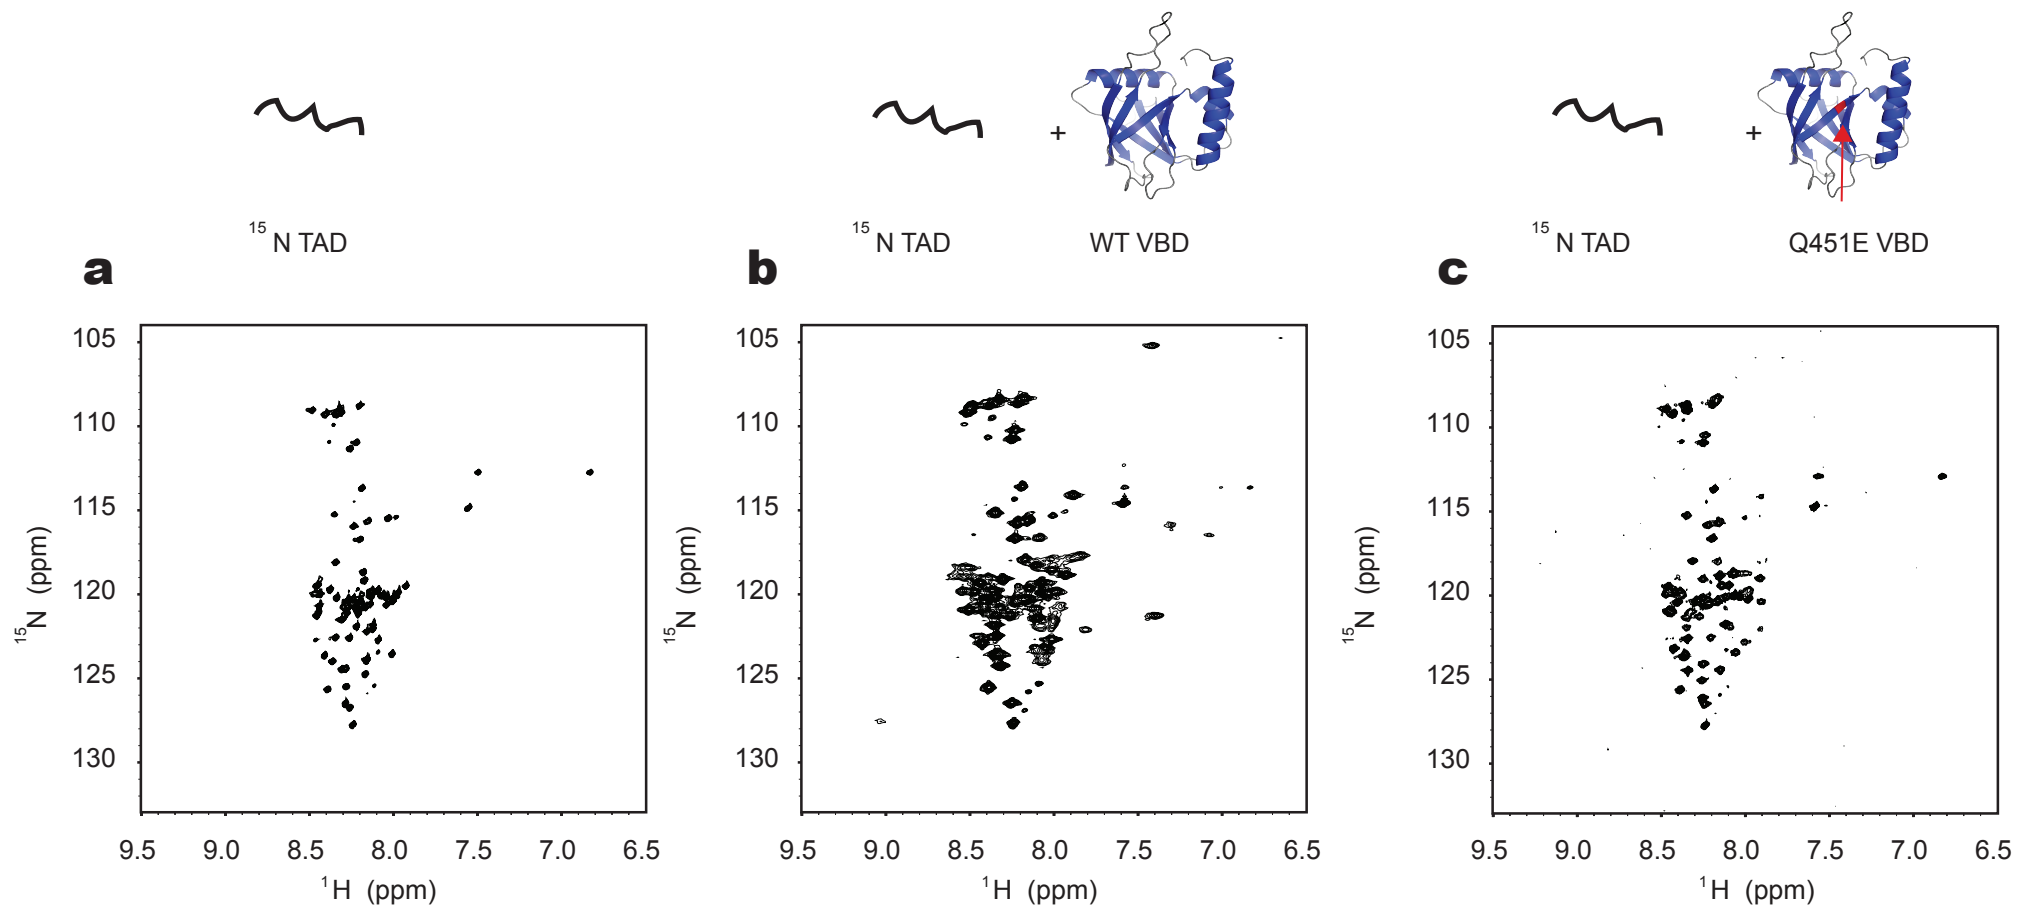

**Supplementary Figure 6.** The MED25 VBD Q451E mutation on  $\beta 3$  adjacent to the hydrophobic pocket also disrupts binding of full-length VP16 TAD to MED25 VBD.  $^1\text{H}$ - $^{15}\text{N}$ -HSQC spectra of free VP16 TAD (**a**), at 1:1 ratio of wild-type MED25 VBD (**b**) and with 1:1.5 excess of Q451E MED25 VBD (**c**) show that VP16 TAD only loosely binds, as seen by minor chemical shift changes, to mutant MED25 VBD without adopting a folded conformation. Far-shifted and broadened signals caused by the addition of wild-type MED25 VBD (**b**), are missing when the mutant MED25 VBD is added to  $^{15}\text{N}$ -labeled VP16 TAD (**c**).

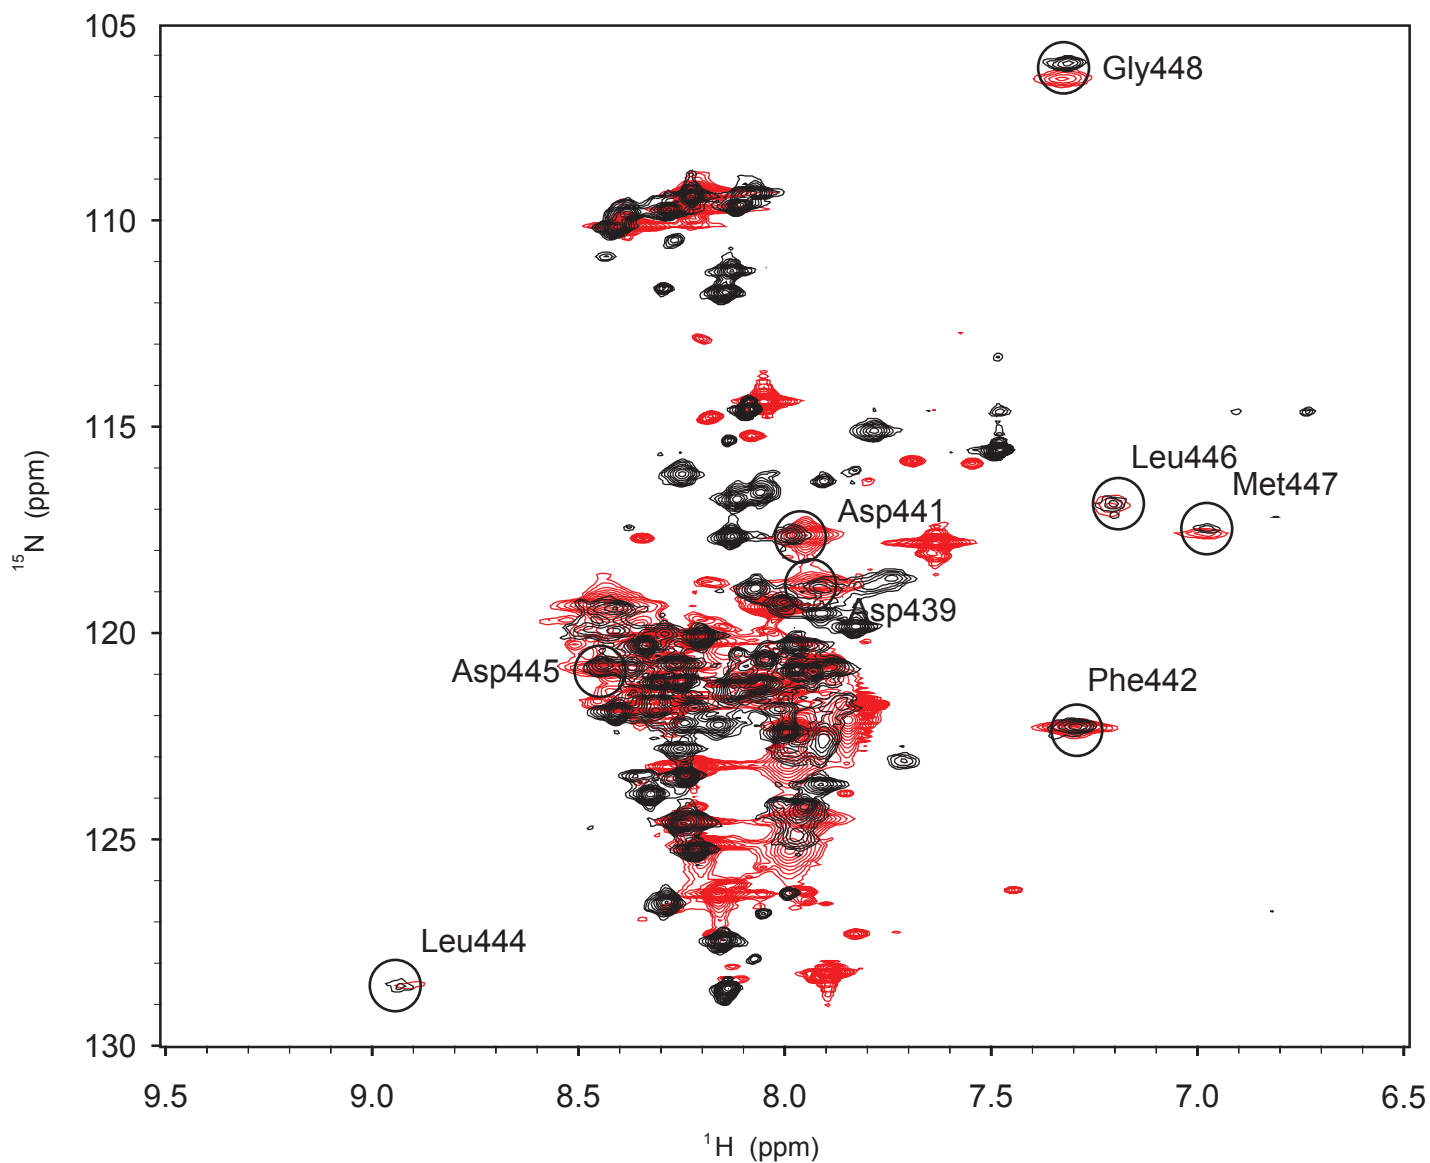

**Supplementary Figure 7.**  $^1\text{H}$ - $^{15}\text{N}$ -HSQC spectra of the VP16 TAD (black signals) and the VP16 TADn (red signals) in the presence of 1.3 equivalents MED25 VBD. Far-shifted resonances overlap for both peptides and are indicated by circles and assignment.



**a**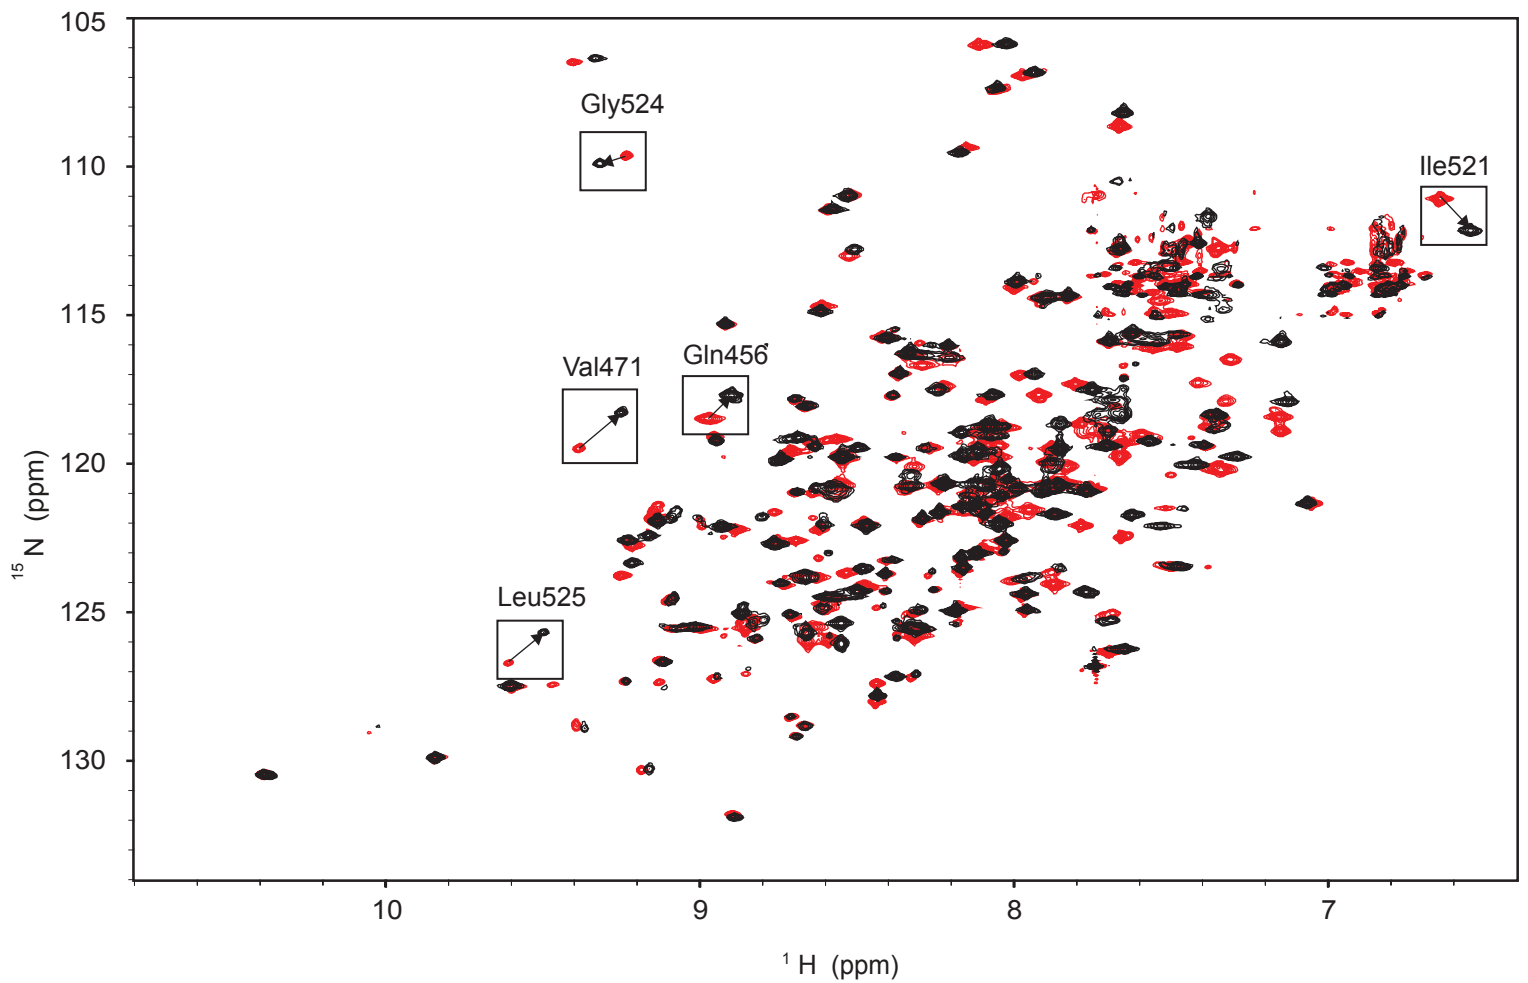**b**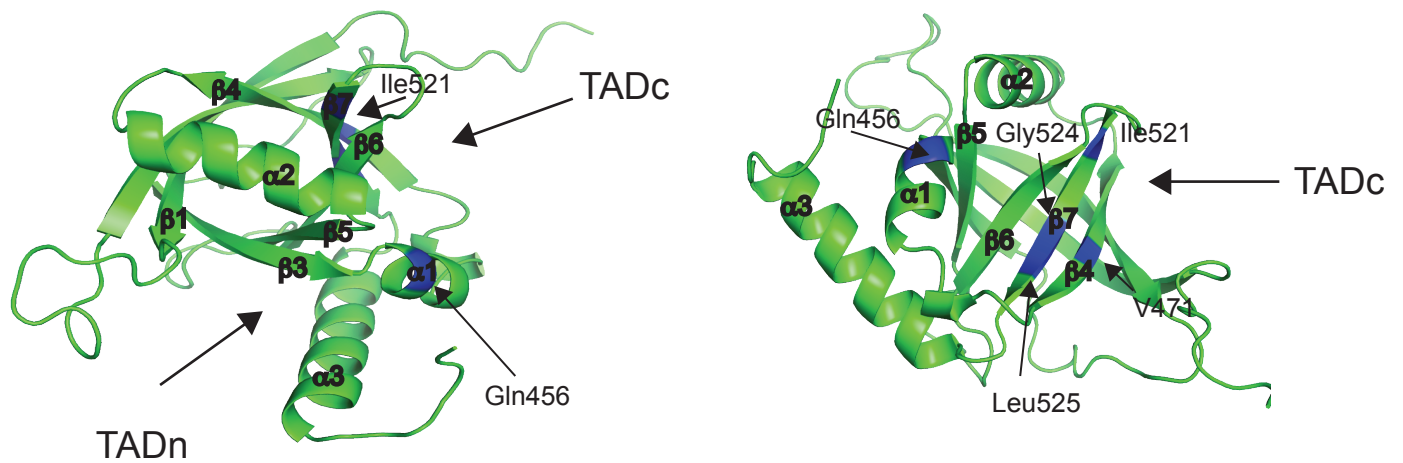

**Supplementary Figure 8.** Mapping the TADc binding site on MED25 VBD. **(a)** Overlay of  $^1\text{H}$ - $^{15}\text{N}$ -TROSY-HSQC<sup>5</sup> spectra of the MED25 VBD bound to the VP16 TADn (red) and the MED25 VBD bound to the VP16 TAD (black). **(b)** A cartoon representation shows the clustering of the residues experiencing distinct chemical shifts upon interaction with VP16 TADc on  $\beta 4$  and  $\beta 7$ . The TADn and TADc binding sites are located on different sides of the MED25 VBD barrel.

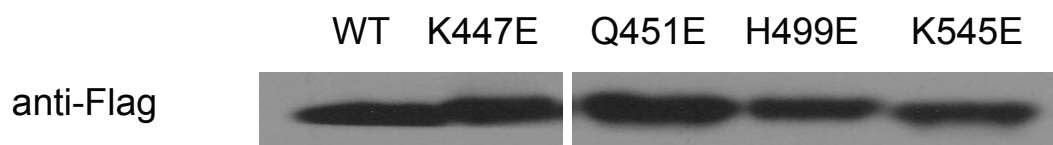

**Supplementary Figure 9.** Wild-type and mutant MED25 VBD displayed comparable level of expression in transfected HEK293T cells when immunoblotted with anti-Flag antibody.

**Supplementary Table 1.** Ramachandran Plot Summary of the MED25 VBD structure from PROCHECK<sup>6</sup>.

| <b>Ramachandran Plot Summary from PROCHECK</b> |       |
|------------------------------------------------|-------|
| Most favoured regions                          | 89.1% |
| Additionally allowed regions                   | 10.4% |
| Generously allowed regions                     | 0.5%  |
| Disallowed regions                             | 0.0%  |

### **Supplementary References**

1. Gouet, P., Courcelle, E., Stuart, D.I. & Metz, F. ESPript: analysis of multiple sequence alignments in PostScript. *Bioinformatics* **15**, 305-308 (1999).
2. Holm, L. & Sander, C. Protein structure comparison by alignment of distance matrices. *J Mol Biol* **233**, 123-138 (1993).
3. Walker, J.R., Corpina, R.A. & Goldberg, J. Structure of the Ku heterodimer bound to DNA and its implications for double-strand break repair. *Nature* **412**, 607-614 (2001).
4. Ariyoshi, M. & Schwabe, J.W. A conserved structural motif reveals the essential transcriptional repression function of Spen proteins and their role in developmental signaling. *Genes Dev* **17**, 1909-1920 (2003).
5. Pervushin, K., Riek, R., Wider, G. & Wüthrich, K. Attenuated T2 relaxation by mutual cancellation of dipole-dipole coupling and chemical shift anisotropy indicates an avenue to NMR structures of very large biological macromolecules in solution. *Proc Natl Acad Sci U S A* **94**, 12366-12371 (1997).
6. Laskowski, R.A., Rullmann, J.A., MacArthur, M.W., Kaptein, R. & Thornton, J.M. AQUA and PROCHECK-NMR: programs for checking the quality of protein structures solved by NMR. *J Biomol NMR* **8**, 477-486 (1996).
